# Supplementary material
Source: Springer Nature journal article supplement (https://www.springermedizin.de/resource/supplementary/12939_2003_10_MOESM1_ESM.pdf/9551286)

Cumulative proportion  
of ill-health

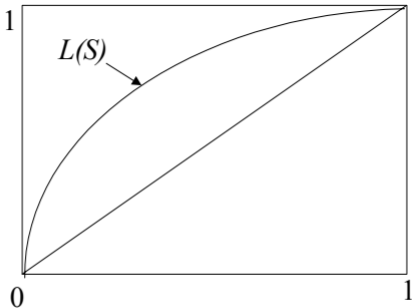

Cumulative proportion of population  
ranked by SES

Supplement: MOESM1 [file 9551286]
